# Supplementary material
Source: MDPI journal article supplement (https://www.mdpi.com/2071-1050/11/4/1209)
Supplement: s1 [file s1]

A TYPE

Stated preference survey for new  
freight transportation modes

ID

|                                              |                |                                     |  |
|----------------------------------------------|----------------|-------------------------------------|--|
| <input type="checkbox"/> Company Name        |                | <input type="checkbox"/> Department |  |
| <input type="checkbox"/> Position            |                | <input type="checkbox"/> Name       |  |
| <input type="checkbox"/> Company Address     |                |                                     |  |
| <input type="checkbox"/> Phone #             |                | <input type="checkbox"/> FAX        |  |
| <input type="checkbox"/> E-mail              |                |                                     |  |
| <input type="checkbox"/> Interview date/time | MM / DD / YYYY | Interviewer<br>Phone :<br>FAX :     |  |
| <input type="checkbox"/> Interviewer's name  |                |                                     |  |

## ● Basic Information ●

SQ1) what is the type of your company ?

[1] Carrier(logistics) company [2] Shipper [3] Others (→ Stop the interview)

SQ2) Are you responsible for(or influential in) the modal choice of freight transportation ?

[1] Yes [2] No (→ Stop the interview)

SQ3) Major freight transportation mode ?

[1] Road(trailer) [2] Rail (including road transportation to/from railway station) (→ Stop the interview)[3] Others (→ Stop the interview)

## ● Actual Situation of Container transportation ●

Q1) How many percent reduce of the current transportation cost on the road do you think you can convert to a new mode?

\_\_\_\_\_ % reduction

Q2) How many percent reduce of the current transportation time on the road do you think you can convert to a new mode?

\_\_\_\_\_ % reduction

Q3) Do you think you can convert to a new mode when the cost and time reductions that you have answered on Q1 and Q2 are achieved?

- |                    |                            |
|--------------------|----------------------------|
| [1] Definitely not | → <u>Move to Q4)</u>       |
| [2] No             | → <u>Move to Q4)</u>       |
| [3] Neutral        | → <u>Move to SP Survey</u> |
| [4] Yes            | → <u>Move to SP Survey</u> |
| [5] Definitely yes | → <u>Move to SP Survey</u> |

Q4) If you do not convert to a new mode, what is the reason?

- [1] Because of long distance between freight origin(or destination) and the terminal of new mode
- [2] Because you have to use your company truck first.
- [3] No time or cost advantages expected
- [4] The new mode seems unstable
- [5] Because of your concern that truck transportation job will be reduced in the future because of the new mode
- [6] Others (\_\_\_\_\_)

## ㉠ SP Survey ㉠

- ◆ When transportation cost(for trunk line), trans-shipment cost, transporation time(for trunk line) and trans-shipment time are given for each transportation mode(new mode and road), please check your one preferred mode.
- ◆ Please refer the description of level of service below.

| Level of service items                                                                                                                                                                                                                                                                                                                                                   | Level of service                                                              |
|--------------------------------------------------------------------------------------------------------------------------------------------------------------------------------------------------------------------------------------------------------------------------------------------------------------------------------------------------------------------------|-------------------------------------------------------------------------------|
| 1. Timeliness to arrive at the destination at the appointed time<br>2. Ease of vehicle use when needed<br>3. Safety on cargo transportation against damage or loss<br>4. Convenience such as providing information on the location and arrival of cargo<br>5. Connection with other modes<br>6. Usability (potential) to smoothly handle future increase in cargo volume | 100% : Overall satisfaction<br>80% : Neutral<br>60% : Overall dissatisfaction |

| Situation 1  | Mode     | Cost (won) | Time (minute) | Level of service (%) | Preferred mode  |
|--------------|----------|------------|---------------|----------------------|-----------------|
|              | New mode | 164,040    | 70            | 60                   | 1.New mode      |
|              | Road     | 171,600    | 63            | 60                   | 2.Road(trailer) |
| Situation 2  | Mode     | Cost (won) | Time (minute) | Level of service (%) | Preferred mode  |
|              | New mode | 205,050    | 70            | 80                   | 1.New mode      |
|              | Road     | 171,600    | 79            | 60                   | 2.Road(trailer) |
| Situation 3  | Mode     | Cost (won) | Time (minute) | Level of service (%) | Preferred mode  |
|              | New mode | 205,050    | 96            | 60                   | 1.New mode      |
|              | Road     | 235,950    | 63            | 80                   | 2.Road(trailer) |
| Situation 4  | Mode     | Cost (won) | Time (minute) | Level of service (%) | Preferred mode  |
|              | New mode | 225,555    | 96            | 80                   | 1.New mode      |
|              | Road     | 235,950    | 79            | 80                   | 2.Road(trailer) |
| Situation 5  | Mode     | Cost (won) | Time (minute) | Level of service (%) | Preferred mode  |
|              | New mode | 164,040    | 70            | 60                   | 1.New mode      |
|              | Road     | 235,950    | 87            | 100                  | 2.Road(trailer) |
| Situation 6  | Mode     | Cost (won) | Time (minute) | Level of service (%) | Preferred mode  |
|              | New mode | 205,050    | 70            | 80                   | 1.New mode      |
|              | Road     | 235,950    | 63            | 100                  | 2.Road(trailer) |
| Situation 7  | Mode     | Cost (won) | Time (minute) | Level of service (%) | Preferred mode  |
|              | New mode | 164,040    | 96            | 100                  | 1.New mode      |
|              | Road     | 214,500    | 79            | 60                   | 2.Road(trailer) |
| Situation 8  | Mode     | Cost (won) | Time (minute) | Level of service (%) | Preferred mode  |
|              | New mode | 164,040    | 96            | 100                  | 1.New mode      |
|              | Road     | 235,950    | 87            | 80                   | 2.Road(trailer) |
| Situation 9  | Mode     | Cost (won) | Time (minute) | Level of service (%) | Preferred mode  |
|              | New mode | 225,555    | 96            | 80                   | 1.New mode      |
|              | Road     | 214,500    | 63            | 60                   | 2.Road(trailer) |
| Situation 10 | Mode     | Cost (won) | Time (minute) | Level of service (%) | Preferred mode  |
|              | New mode | 164,040    | 70            | 60                   | 1.New mode      |
|              | Road     | 214,500    | 79            | 80                   | 2.Road(trailer) |

|              |          |            |               |                      |                 |
|--------------|----------|------------|---------------|----------------------|-----------------|
| Situation 11 | Mode     | Cost (won) | Time (minute) | Level of service (%) | Preferred mode  |
|              | New mode | 225,555    | 70            | 100                  | 1.New mode      |
|              | Road     | 214,500    | 63            | 80                   | 2.Road(trailer) |
| Situation 12 | Mode     | Cost (won) | Time (minute) | Level of service (%) | Preferred mode  |
|              | New mode | 164,040    | 87            | 80                   | 1.New mode      |
|              | Road     | 171,600    | 63            | 80                   | 2.Road(trailer) |
| Situation 13 | Mode     | Cost (won) | Time (minute) | Level of service (%) | Preferred mode  |
|              | New mode | 205,050    | 87            | 100                  | 1.New mode      |
|              | Road     | 171,600    | 79            | 80                   | 2.Road(trailer) |
| Situation 14 | Mode     | Cost (won) | Time (minute) | Level of service (%) | Preferred mode  |
|              | New mode | 205,050    | 96            | 60                   | 1.New mode      |
|              | Road     | 214,500    | 87            | 60                   | 2.Road(trailer) |
| Situation 15 | Mode     | Cost (won) | Time (minute) | Level of service (%) | Preferred mode  |
|              | New mode | 164,040    | 87            | 80                   | 1.New mode      |
|              | Road     | 214,500    | 79            | 100                  | 2.Road(trailer) |
| Situation 16 | Mode     | Cost (won) | Time (minute) | Level of service (%) | Preferred mode  |
|              | New mode | 225,555    | 87            | 60                   | 1.New mode      |
|              | Road     | 214,500    | 63            | 100                  | 2.Road(trailer) |
| Situation 17 | Mode     | Cost (won) | Time (minute) | Level of service (%) | Preferred mode  |
|              | New mode | 225,555    | 70            | 100                  | 1.New mode      |
|              | Road     | 171,600    | 87            | 60                   | 2.Road(trailer) |
| Situation 18 | Mode     | Cost (won) | Time (minute) | Level of service (%) | Preferred mode  |
|              | New mode | 205,050    | 87            | 100                  | 1.New mode      |
|              | Road     | 235,950    | 63            | 60                   | 2.Road(trailer) |
| Situation 19 | Mode     | Cost (won) | Time (minute) | Level of service (%) | Preferred mode  |
|              | New mode | 225,555    | 87            | 60                   | 1.New mode      |
|              | Road     | 235,950    | 79            | 60                   | 2.Road(trailer) |
| Situation 20 | Mode     | Cost (won) | Time (minute) | Level of service (%) | Preferred mode  |
|              | New mode | 164,040    | 96            | 100                  | 1.New mode      |
|              | Road     | 171,600    | 63            | 100                  | 2.Road(trailer) |
| Situation 21 | Mode     | Cost (won) | Time (minute) | Level of service (%) | Preferred mode  |
|              | New mode | 205,050    | 96            | 60                   | 1.New mode      |
|              | Road     | 171,600    | 79            | 100                  | 2.Road(trailer) |

– Thank you for your cooperation. –
